# Supplementary material for: Divergent Expression Patterns and Function Implications of Four nanos Genes in a Hermaphroditic Fish, Epinephelus coioides
Source: MDPI journal article supplement (doi:10.3390/ijms18040685), 2017-03-23
Supplement: s1 [file s1]

# Supplementary Materials

**Table S1.** Sequences of the primers used for PCR.

| Primer Name                | Purpose | Sequence(5' to 3')                                |
|----------------------------|---------|---------------------------------------------------|
| <i>nanos1a</i> -5' RACE-R1 | RACE    | AGCAGTCCAGGTGCCCCGCTCTCTCCAA                      |
| <i>nanos1a</i> -5' RACE-R2 | RACE    | ACGCCGGGGAATCGTCCAAGCCCAGG                        |
| <i>nanos1a</i> -5' RACE-R3 | RACE    | TCGGTGATGGAGTTGGGGTTCTGGGG                        |
| <i>nanos1a</i> -3' RACE-F1 | RACE    | TAATCGCGGGCAGCGTTGGAGA                            |
| <i>nanos1a</i> -3' RACE-F2 | RACE    | GTTTCTCGATACTGAGCCCCCTTC                          |
| <i>nanos1b</i> -5' RACE-R1 | RACE    | GTCCATGGAGAGCAGGTCTGAG                            |
| <i>nanos1b</i> -5' RACE-R2 | RACE    | GTGCTCGTACGGCCTGAGAAGAGA                          |
| <i>nanos1b</i> -3' RACE-F1 | RACE    | TAATTGGGCACGGCAGGGACA                             |
| <i>nanos1b</i> -3' RACE-F2 | RACE    | ACCCTTGGA CTGCTGCTGCGC                            |
| <i>nanos1b</i> -3' RACE-F3 | RACE    | CTCTCTTCTCAGGCCGTACGAGCAC                         |
| <i>nanos2</i> -5' RACE-R1  | RACE    | GTCCGAGAGGCTGGAGGGTGA                             |
| <i>nanos2</i> -5' RACE-R2  | RACE    | TGGGTGACATAGTCCCGGAGA                             |
| <i>nanos2</i> -3' RACE-F1  | RACE    | GGGACGAGTACACCTTTGACAGTG                          |
| <i>nanos2</i> -3' RACE-F2  | RACE    | CCTGTTAGGGACTAGTTCACCC                            |
| <i>nanos3</i> -5' RACE-R1  | RACE    | TCAGCACGGAAGGGGTCTGTAGCG                          |
| <i>nanos3</i> -5' RACE-R2  | RACE    | CGAGGTCGCCGCTTTGGCACA                             |
| <i>nanos3</i> -5' RACE-R3  | RACE    | GACAGTCCTATGTAGTCTCTCC                            |
| <i>nanos3</i> -3' RACE-F1  | RACE    | CGCTACAGACCCCTTCCGTGCTGA                          |
| <i>nanos3</i> -3' RACE-F2  | RACE    | AACCAGGCCGGGGATGTTCTG                             |
| <i>nanos1a</i> -F          | RT-PCR  | GACTTGAAGGAGCGTTTCTCGAT                           |
| <i>nanos1a</i> -R          | RT-PCR  | CTTTAATGGTCGCTGGGATGGC                            |
| <i>nanos1b</i> -F          | RT-PCR  | CGGTTTGCTCCTGCGTAATTGG                            |
| <i>nanos1b</i> -R          | RT-PCR  | CTTCAGGATGTGGGTGCCGTAA                            |
| <i>nanos2</i> -F           | RT-PCR  | ACTACCCTCTCCGGGACTATGT                            |
| <i>nanos2</i> -R           | RT-PCR  | GCGTCATCAGTCATTTCACTTTCCC                         |
| <i>nanos3</i> -F           | RT-PCR  | TGTGCCAAAGCGGCGACCTCG                             |
| <i>nanos3</i> -R           | RT-PCR  | CAGAACATCCCCGGCCTGGTT                             |
| $\beta$ -actin-F           | RT-PCR  | GAAATCGCCGCACTGAGTTGTTG                           |
| $\beta$ -actin-R           | RT-PCR  | ACCATCACTCCCTGATGCCT                              |
| <i>nanos1a</i> -probe-F    | ISH     | GCCAGGAGCTGATGGAGTTTGAGT                          |
| <i>nanos1a</i> -probe-R    | ISH     | TAATACGACTCACTATAGGAGACTTTGGAATG<br>TCAGGCTTTTCAT |
| <i>nanos1b</i> -probe-F    | ISH     | GCCATCCCAGCGACCATTAAAG                            |
| <i>nanos1b</i> -probe-R    | ISH     | TAATACGACTCACTATAGGTCATCCCCTTTGC<br>CAATGTCAG     |
| <i>nanos2</i> -probe-F     | ISH     | GACGGGGAGTGCTTCGACATGT                            |
| <i>nanos2</i> -probe-R     | ISH     | TAATACGACTCACTATAGGGCGTCATCAGTCA<br>TTTCACTTTCCC  |
| <i>nanos3</i> -probe-F     | ISH     | CTGGAGAGACTACATAGGACTGTC                          |
| <i>nanos3</i> -probe-R     | ISH     | TAATACGACTCACTATAGGTGGCCCCCGTGGC<br>TCCGCACA      |

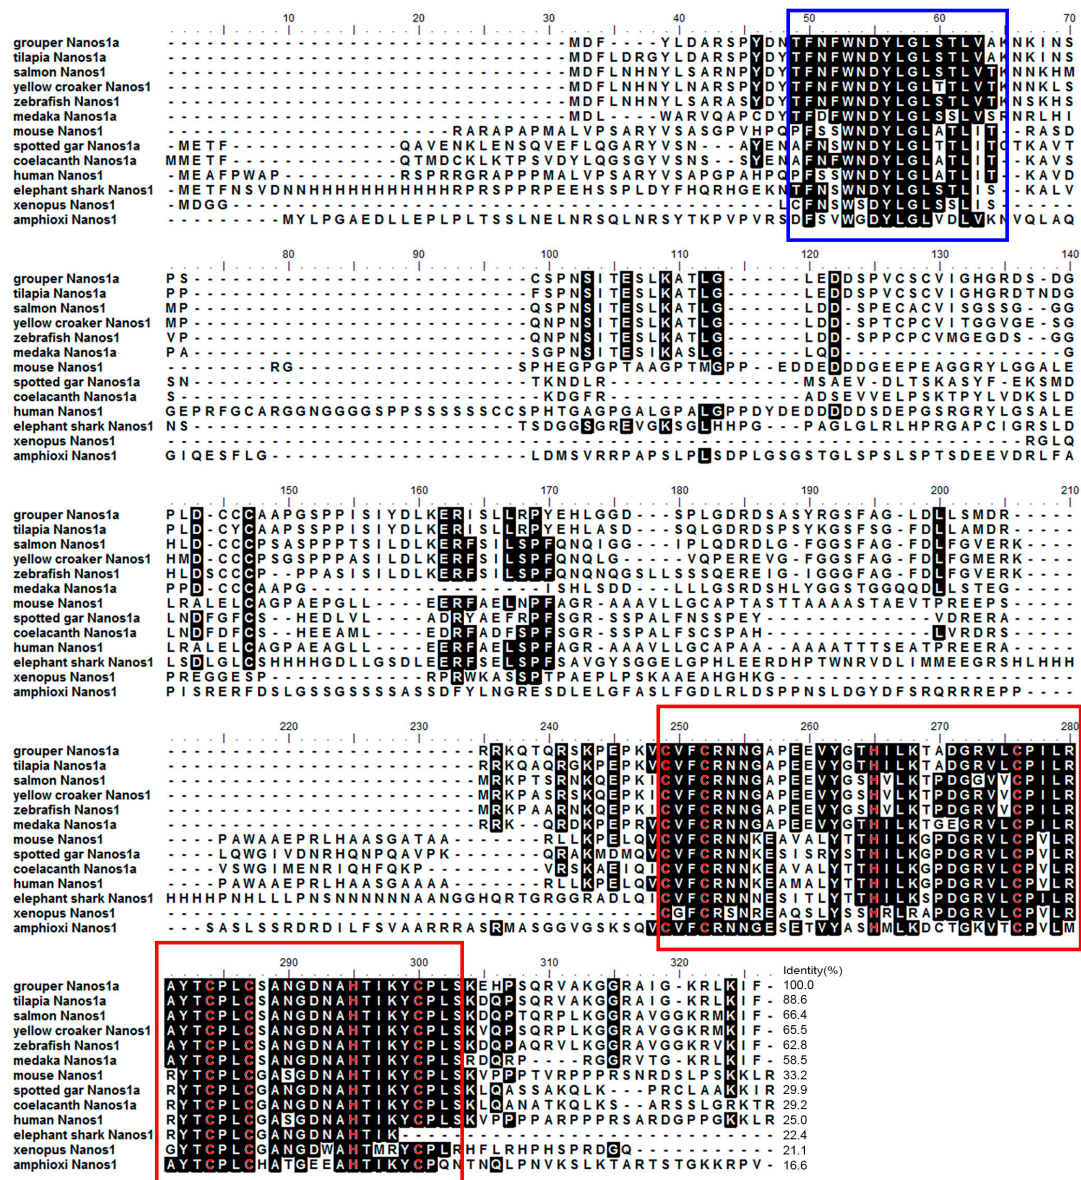

**Figure S1.** Amino acid alignments of *E. coioides* Nanos1A with the homologues from other vertebrates. The identities relative to *E. coioides* Nanos1A are exhibited at the end of each sequence. The blue frame indicates the conserved position of CCR4-NOT deadenylation interaction domain. The red frame indicates the conserved position of zf-domain. The 8 invariant cysteine and histidine residues in zf-domain were marked with red color.

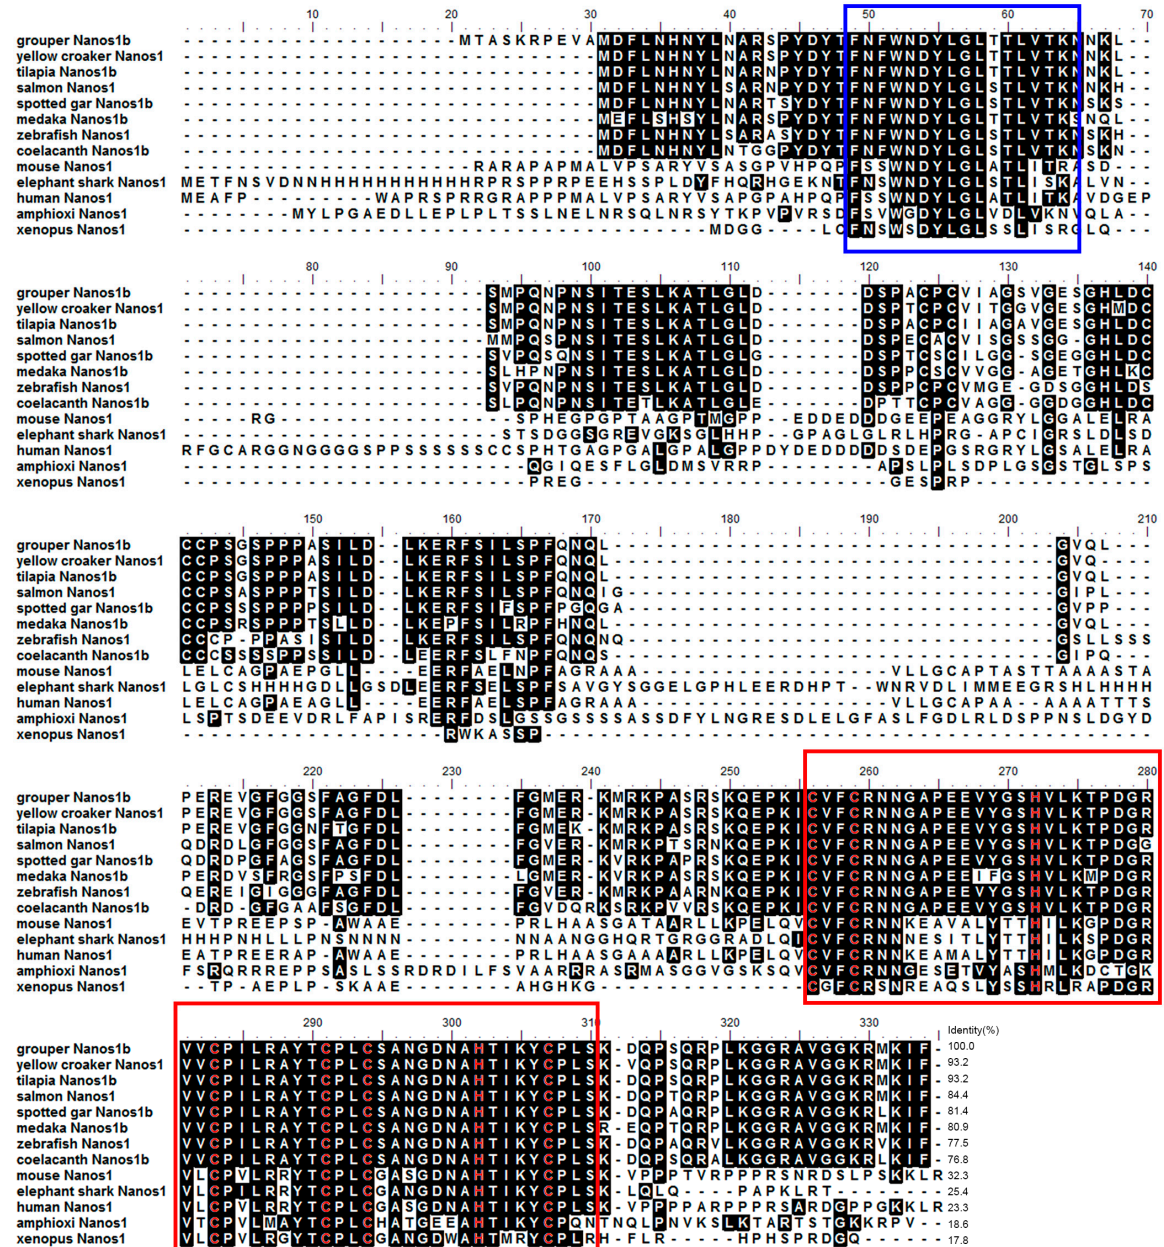

**Figure S2.** Amino acid alignments of *E. coioides* Nanos1B with the homologues from other vertebrates. The identities relative to *E. coioides* Nanos1B are exhibited at the end of each sequence. The blue frame indicates the conserved position of CCR4-NOT deadenylation domain. The red frame indicates the conserved position of zf-domain. The 8 invariant cysteine and histidine residues in zf-domain were marked with red color.



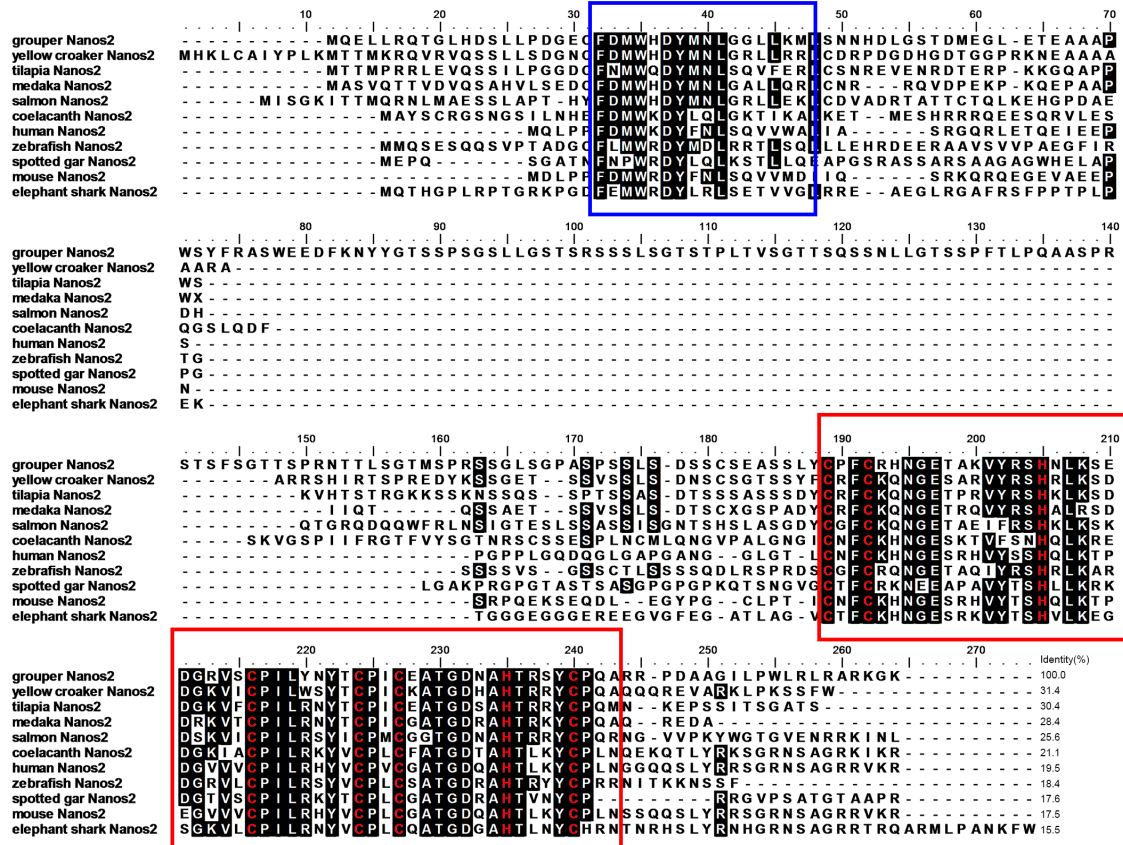

**Figure S3.** Amino acid alignments of *E. coioides* Nanos2 with the homologues from other vertebrates. The identities relative to *E. coioides* Nanos2 are exhibited at the end of each sequence. The blue frame indicates the conserved position of CCR4-NOT deadenylation interaction domain. The red frame indicates the conserved position of zf-domain. The 8 invariant cysteine and histidine residues in zf-domain were marked with red color.



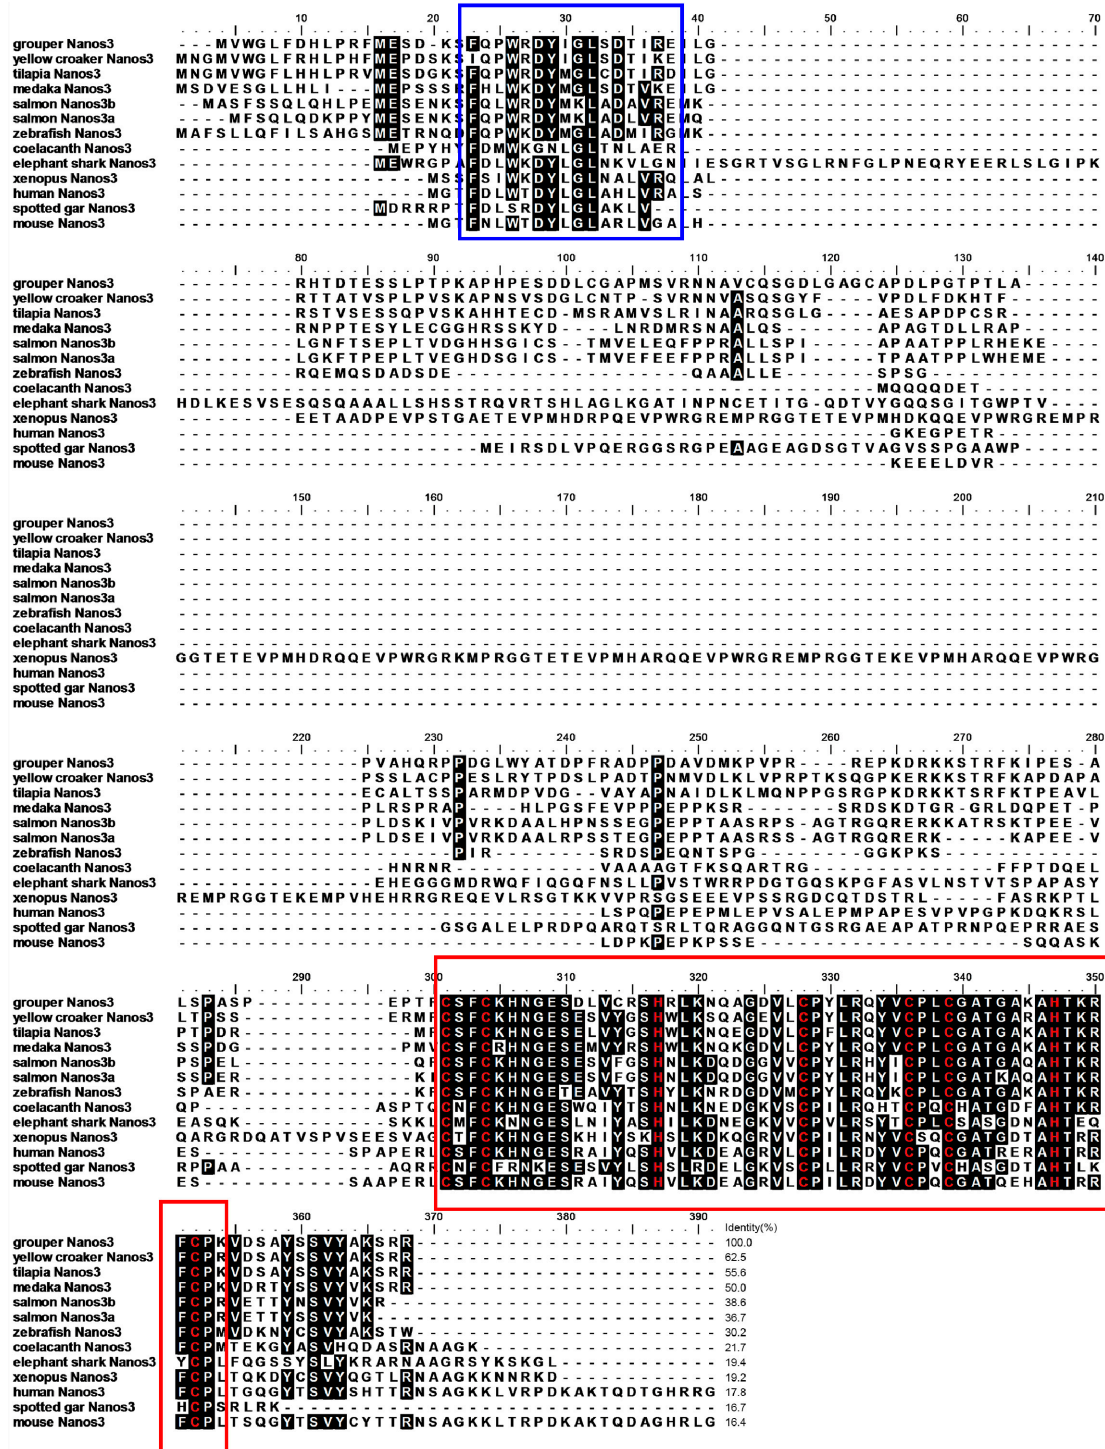

**Figure S4.** Amino acid alignments of *E. coioides* Nanos3 with the homologues from other vertebrates. The identities relative to *E. coioides* Nanos3 are exhibited at the end of each sequence. The blue frame indicates the conserved position of CCR4-NOT deadenylation interaction domain. The red frame indicates the conserved position of zf-domain. The 8 invariant cysteine and histidine residues in zf-domain were marked with red color.

### *Ecnanos3* 3'UTR

```

ACCAGCAGGTGGCAGGTAGCAAAAAGACACAGAGGGCTGAAACTTCCTT
TTATTGAGTGTGGTTTTGTTTTATTATCACGTGTGTGTGTGTGTAGTTTG
GGTTTTATTTGCATGCTTTGSCACGTTTGCCTTGTAGCCTTCTCTAAAGC
TGATTGGAGTTATTTCCAGCTGGTCTTTTACGGCCCTTGCTTTCTCTAA
CAGTGTCCCTTTGGGGGTTTTCATTTTGTATTGTTCTTTCAATAACGACTG
CCAGATATGTTTGGGAGGAGAAAAAATAAAGACAATGTAAGTTTTATTT
TTTTTAAATGAAACATTTTTTAACATGGCCACTTAATATCATACCTCCTGC
CCATGCATTAAAGGATCATCACACTGTCACACCTTTCTCTGAAGACCTAT
CAGTAATAACTTTAATACACCATGTAAACATCAAGTGACCATGTCAGCATT
TTAAATTATTTATTTAATTAATATATGAGTGAGGTGTTCTTGTTCGTAC
CTGTTCTGAGGCATGTTTGTGTTTTATTTCAATATTGTACATGTGGCTCTT
CTAAAATGCCGCAAAAGCTCTTCTCACTCTGAGAAAAGAAATGTGTGAAT
TAATCTGTGTGAATATTATTGTATGCCAGAATATACATAGTGAACCAAAA
AAAAAAAAAAAAAAAAAAAAA

```

**Figure S5.** The sequence of *Ecnanos3* 3'-UTR. U-rich motifs are marked with gray shadow and the putative miR-430 binding site is indicated with frame where the different nucleotide against canonical seed sequence of miR-430 is marked by red.

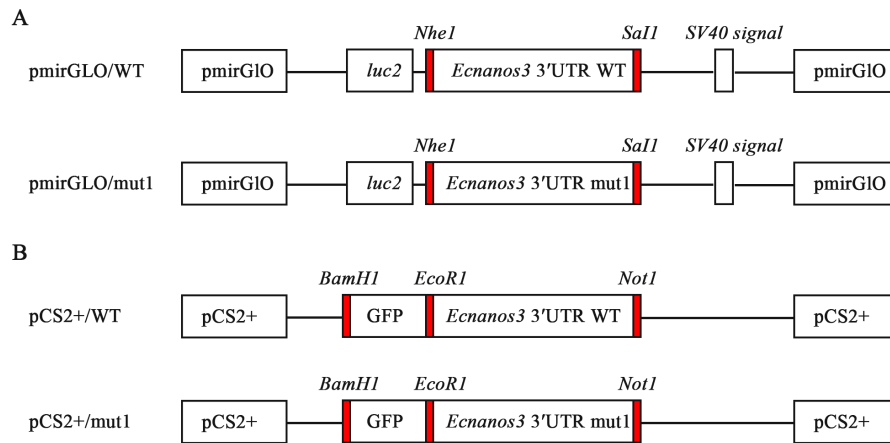

**Figure S6.** Schematic of the luciferase constructs and GFP constructs. (A) Schematic of the luciferase constructs. (B) Schematic of the GFP constructs.

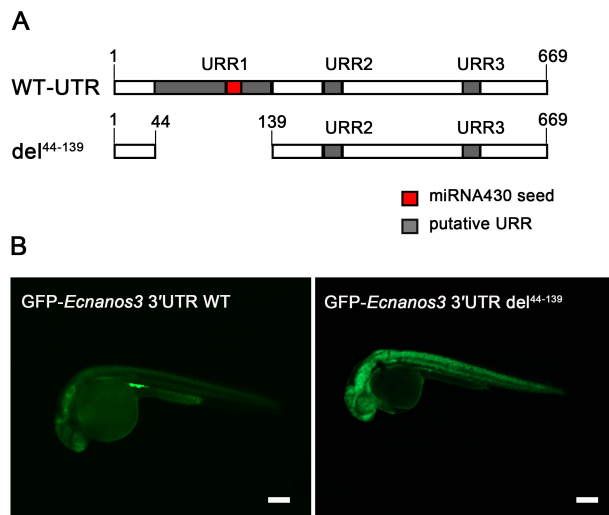

**Figure S7.** Schematic representation of *Ecnanos3* 3'-UTR del44-139 and function of URR1 in *Ecnanos3* 3'-UTR. (A) Schematic representation of *Ecnanos3* 3'-UTR del44-139; (B) PGCs visualization at 26 hpf by using GFP fused *Ecnanos3* 3'-UTR WT and *Ecnanos3* 3'-UTR del44-139, respectively. Bar: 250  $\mu$ m.
